# Supplementary material for: Transcriptome Reveals Long Non-coding RNAs and mRNAs Involved in Primary Wool Follicle Induction in Carpet Sheep Fetal Skin
Source: Front Physiol. 2018 May 15;9:446. doi: 10.3389/fphys.2018.00446 (PMC5968378; doi:10.3389/fphys.2018.00446)
Supplement: TABLE S6 — Significantly enriched KEGG pathways of differentially expressed mRNAs. [file Data_Sheet_6.XLSX]

## Sheet: Sheet1
##Databases: KEGG PATHWAY
##Statistical test method: hypergeometric test / Fisher's exact test
##FDR correction method: Benjamini and Hochberg
#Term	Database	ID	Input number	Background number	P-Value	Corrected P-Value	Input	KO	Entrez_ID	KO_name	Hyperlink
ECM-receptor interaction	KEGG PATHWAY	oas04512	14	89	2.62703e-06	0.00051227	ENSOARG00000000744|ENSOARG00000009764|ENSOARG00000014039|ENSOARG00000000327|ENSOARG00000017490|ENSOARG00000005412|ENSOARG00000020058|ENSOARG00000005941|ENSOARG00000007270|ENSOARG00000008389|ENSOARG00000002590|ENSOARG00000018591|ENSOARG00000019333|ENSOARG00000014461	oas:100216328|oas:101119919|oas:101115457|oas:101102692|oas:101115211|oas:101118038|oas:101106433|oas:101118337|oas:101122429|oas:101117689|oas:443058|oas:101117548|oas:100196905|oas:101114569|	100216328|101119919|101115457|101102692|101115211|101118038|101106433|101118337|101122429|101117689|443058|101117548|100196905|101114569|	LAMC2|ITGB4|COL5A3|LAMA1|THBS4|ITGA3|THBS1|TNC|LAMC3|ITGA8|SPP1, OPN|COL11A1|COL2A1|COL24A1|	http://www.genome.jp/kegg-bin/show_pathway?oas04512/oas:101118337%09red/oas:101115211%09red/oas:443058%09red/oas:101118038%09red/oas:100216328%09red/oas:101117548%09red/oas:101117689%09red/oas:101106433%09red/oas:101114569%09red/oas:101115457%09red/oas:101122429%09red/oas:101102692%09red/oas:101119919%09red/oas:100196905%09red
Hypertrophic cardiomyopathy (HCM)	KEGG PATHWAY	oas05410	12	77	1.46834e-05	0.0012082	ENSOARG00000009764|ENSOARG00000017779|ENSOARG00000010512|ENSOARG00000002050|ENSOARG00000005412|ENSOARG00000006996|ENSOARG00000020185|ENSOARG00000008389|ENSOARG00000013089|ENSOARG00000004312|ENSOARG00000001845|ENSOARG00000018404	oas:101119919|oas:100196904|oas:101110936|oas:554323|oas:101118038|oas:101115408|oas:101117308|oas:101117689|oas:101116562|oas:101111132|oas:100145865|oas:101114682|	101119919|100196904|101110936|554323|101118038|101115408|101117308|101117689|101116562|101111132|100145865|101114682|	ITGB4|MYL2|SGCD|TGFB3|ITGA3|MYL3|DES|ITGA8|CACNA1C|TNNC1|TPM1| |	http://www.genome.jp/kegg-bin/show_pathway?oas05410/oas:101110936%09red/oas:101116562%09red/oas:101111132%09red/oas:101118038%09red/oas:101117689%09red/oas:100196904%09red/oas:101115408%09red/oas:100145865%09red/oas:101117308%09red/oas:101119919%09red/oas:554323%09red/oas:101114682%09red
Focal adhesion	KEGG PATHWAY	oas04510	20	210	2.41442e-05	0.0012082	ENSOARG00000020143|ENSOARG00000000744|ENSOARG00000009764|ENSOARG00000014039|ENSOARG00000017779|ENSOARG00000000327|ENSOARG00000017490|ENSOARG00000005412|ENSOARG00000020058|ENSOARG00000002590|ENSOARG00000002180|ENSOARG00000007515|ENSOARG00000007270|ENSOARG00000005941|ENSOARG00000008389|ENSOARG00000012064|ENSOARG00000003293|ENSOARG00000018591|ENSOARG00000019333|ENSOARG00000014461	oas:101112573|oas:100216328|oas:101119919|oas:101115457|oas:100196904|oas:101102692|oas:101115211|oas:101118038|oas:101106433|oas:443058|oas:101123247|oas:101107228|oas:101122429|oas:101118337|oas:101117689|oas:101102873|oas:101117784|oas:101117548|oas:100196905|oas:101114569|	101112573|100216328|101119919|101115457|100196904|101102692|101115211|101118038|101106433|443058|101123247|101107228|101122429|101118337|101117689|101102873|101117784|101117548|100196905|101114569|	PAK6|LAMC2|ITGB4|COL5A3|MYL2|LAMA1|THBS4|ITGA3|THBS1|SPP1, OPN|PIK3R3|CAV3|LAMC3|TNC|ITGA8|FIGF|PDGFD|COL11A1|COL2A1|COL24A1|	http://www.genome.jp/kegg-bin/show_pathway?oas04510/oas:101112573%09red/oas:101118337%09red/oas:101115211%09red/oas:101117784%09red/oas:443058%09red/oas:101118038%09red/oas:100216328%09red/oas:101117548%09red/oas:100196905%09red/oas:101117689%09red/oas:101106433%09red/oas:101114569%09red/oas:101115457%09red/oas:101107228%09red/oas:101122429%09red/oas:100196904%09red/oas:101102692%09red/oas:101102…
Dilated cardiomyopathy	KEGG PATHWAY	oas05414	12	83	2.86775e-05	0.0012082	ENSOARG00000009764|ENSOARG00000017779|ENSOARG00000010512|ENSOARG00000002050|ENSOARG00000005412|ENSOARG00000006996|ENSOARG00000020185|ENSOARG00000008389|ENSOARG00000013089|ENSOARG00000004312|ENSOARG00000001845|ENSOARG00000018404	oas:101119919|oas:100196904|oas:101110936|oas:554323|oas:101118038|oas:101115408|oas:101117308|oas:101117689|oas:101116562|oas:101111132|oas:100145865|oas:101114682|	101119919|100196904|101110936|554323|101118038|101115408|101117308|101117689|101116562|101111132|100145865|101114682|	ITGB4|MYL2|SGCD|TGFB3|ITGA3|MYL3|DES|ITGA8|CACNA1C|TNNC1|TPM1| |	http://www.genome.jp/kegg-bin/show_pathway?oas05414/oas:101110936%09red/oas:101116562%09red/oas:101111132%09red/oas:101118038%09red/oas:101117689%09red/oas:100196904%09red/oas:101115408%09red/oas:100145865%09red/oas:101117308%09red/oas:101119919%09red/oas:554323%09red/oas:101114682%09red
Arrhythmogenic right ventricular cardiomyopathy (ARVC)	KEGG PATHWAY	oas05412	11	70	3.09795e-05	0.0012082	ENSOARG00000020185|ENSOARG00000005412|ENSOARG00000010512|ENSOARG00000019963|ENSOARG00000008064|ENSOARG00000006798|ENSOARG00000008389|ENSOARG00000013089|ENSOARG00000009764|ENSOARG00000018404|ENSOARG00000006399	oas:101117308|oas:101118038|oas:101110936|oas:101122284|oas:780521|oas:101116192|oas:101117689|oas:101116562|oas:101119919|oas:101114682|oas:101118655|	101117308|101118038|101110936|101122284|780521|101116192|101117689|101116562|101119919|101114682|101118655|	DES|ITGA3|SGCD|GJA1|LEF-1|DSC2|ITGA8|CACNA1C|ITGB4| |DSG2|	http://www.genome.jp/kegg-bin/show_pathway?oas05412/oas:101110936%09red/oas:101116562%09red/oas:101118655%09red/oas:101118038%09red/oas:101117689%09red/oas:101122284%09red/oas:101116192%09red/oas:101117308%09red/oas:780521%09red/oas:101119919%09red/oas:101114682%09red
Basal cell carcinoma	KEGG PATHWAY	oas05217	9	56	0.000138772	0.00451009	ENSOARG00000021069|ENSOARG00000019683|ENSOARG00000006674|ENSOARG00000018324|ENSOARG00000008064|ENSOARG00000001264|ENSOARG00000017550|ENSOARG00000008578|ENSOARG00000006942	oas:443502|oas:101116782|oas:101120651|oas:101103229|oas:780521|oas:101110291|oas:101112193|oas:101112193|oas:101117666|	443502|101116782|101120651|101103229|780521|101110291|101112193|101112193|101117666|	BMP4|WNT2B|GLI1|WNT16|LEF-1|PTCH2|PTCH1, PTCH|PTCH1, PTCH|SHH|	http://www.genome.jp/kegg-bin/show_pathway?oas05217/oas:101112193%09red/oas:443502%09red/oas:101117666%09red/oas:101110291%09red/oas:101120651%09red/oas:780521%09red/oas:101103229%09red/oas:101116782%09red
Amoebiasis	KEGG PATHWAY	oas05146	12	113	0.000406994	0.0113377	ENSOARG00000012406|ENSOARG00000000744|ENSOARG00000014039|ENSOARG00000000327|ENSOARG00000002180|ENSOARG00000013144|ENSOARG00000007270|ENSOARG00000006441|ENSOARG00000018591|ENSOARG00000002050|ENSOARG00000019333|ENSOARG00000014461	oas:101121067|oas:100216328|oas:101115457|oas:101102692|oas:101123247|oas:101103054|oas:101122429|oas:101120129|oas:101117548|oas:554323|oas:100196905|oas:101114569|	101121067|100216328|101115457|101102692|101123247|101103054|101122429|101120129|101117548|554323|100196905|101114569|	GNA14|LAMC2|COL5A3|LAMA1|PIK3R3|IL1R1|LAMC3| |COL11A1|TGFB3|COL2A1|COL24A1|	http://www.genome.jp/kegg-bin/show_pathway?oas05146/oas:101103054%09red/oas:101121067%09red/oas:100216328%09red/oas:101117548%09red/oas:100196905%09red/oas:101114569%09red/oas:101115457%09red/oas:101120129%09red/oas:101122429%09red/oas:101102692%09red/oas:554323%09red/oas:101123247%09red
Hedgehog signaling pathway	KEGG PATHWAY	oas04340	8	53	0.000472875	0.0115263	ENSOARG00000021069|ENSOARG00000019683|ENSOARG00000006674|ENSOARG00000018324|ENSOARG00000001264|ENSOARG00000017550|ENSOARG00000008578|ENSOARG00000006942	oas:443502|oas:101116782|oas:101120651|oas:101103229|oas:101110291|oas:101112193|oas:101112193|oas:101117666|	443502|101116782|101120651|101103229|101110291|101112193|101112193|101117666|	BMP4|WNT2B|GLI1|WNT16|PTCH2|PTCH1, PTCH|PTCH1, PTCH|SHH|	http://www.genome.jp/kegg-bin/show_pathway?oas04340/oas:101112193%09red/oas:443502%09red/oas:101117666%09red/oas:101120651%09red/oas:101110291%09red/oas:101103229%09red/oas:101116782%09red
Malaria	KEGG PATHWAY	oas05144	7	53	0.00212565	0.0460558	ENSOARG00000018242|ENSOARG00000019163|ENSOARG00000017490|ENSOARG00000020058|ENSOARG00000010944|ENSOARG00000019174|ENSOARG00000002050	oas:101113636|oas:101105437|oas:101115211|oas:101106433|oas:101108797|oas:101106199|oas:554323|	101113636|101105437|101115211|101106433|101108797|101106199|554323|	|HBB|THBS4|THBS1| | |TGFB3|	http://www.genome.jp/kegg-bin/show_pathway?oas05144/oas:101115211%09red/oas:101106199%09red/oas:101108797%09red/oas:101106433%09red/oas:101105437%09red/oas:101113636%09red/oas:554323%09red
Pathways in cancer	KEGG PATHWAY	oas05200	21	336	0.00295962	0.0541297	ENSOARG00000000744|ENSOARG00000021069|ENSOARG00000012064|ENSOARG00000006681|ENSOARG00000019683|ENSOARG00000000327|ENSOARG00000006674|ENSOARG00000018324|ENSOARG00000002050|ENSOARG00000002180|ENSOARG00000008064|ENSOARG00000001264|ENSOARG00000007270|ENSOARG00000007541|ENSOARG00000017550|ENSOARG00000009585|ENSOARG00000005412|ENSOARG00000011779|ENSOARG00000008578|ENSOARG00000006942|ENSOARG00000005375	oas:100216328|oas:443502|oas:101102873|oas:101117367|oas:101116782|oas:101102692|oas:101120651|oas:101103229|oas:554323|oas:101123247|oas:780521|oas:101110291|oas:101122429|oas:101115509|oas:101112193|oas:101121489|oas:101118038|oas:101119408|oas:101112193|oas:101117666|oas:443548|	100216328|443502|101102873|101117367|101116782|101102692|101120651|101103229|554323|101123247|780521|101110291|101122429|101115509|101112193|101121489|101118038|101119408|101112193|101117666|443548|	LAMC2|BMP4|FIGF|EGLN3|WNT2B|LAMA1|GLI1|WNT16|TGFB3|PIK3R3|LEF-1|PTCH2|LAMC3|CSF2RA|PTCH1, PTCH|FGF20|ITGA3|TRAF5|PTCH1, PTCH|SHH|FGFR2, FGFR2IIIb|	http://www.genome.jp/kegg-bin/show_pathway?oas05200/oas:101117367%09red/oas:554323%09red/oas:101121489%09red/oas:101112193%09red/oas:101118038%09red/oas:100216328%09red/oas:443502%09red/oas:101115509%09red/oas:101117666%09red/oas:101119408%09red/oas:101116782%09red/oas:101110291%09red/oas:101123247%09red/oas:443548%09red/oas:101122429%09red/oas:101120651%09red/oas:101102692%09red/oas:101103229%09…
Complement and coagulation cascades	KEGG PATHWAY	oas04610	8	73	0.00305347	0.0541297	ENSOARG00000002951|ENSOARG00000014882|ENSOARG00000018445|ENSOARG00000007971|ENSOARG00000017273|ENSOARG00000020498|ENSOARG00000009128|ENSOARG00000016534	oas:101115072|oas:443388|oas:101108612|oas:101120257|oas:101122999|oas:101111065|oas:101102931|oas:101120391|	101115072|443388|101108612|101120257|101122999|101111065|101102931|101120391|	CFB|SERPINA1, A1AT, PI, alpha-1-PI|F13A1|CD55|PROS1|MASP1|C7|TFPI|	http://www.genome.jp/kegg-bin/show_pathway?oas04610/oas:101108612%09red/oas:101102931%09red/oas:101111065%09red/oas:101120257%09red/oas:101122999%09red/oas:443388%09red/oas:101120391%09red/oas:101115072%09red
Terpenoid backbone biosynthesis	KEGG PATHWAY	oas00900	4	21	0.00626375	0.100688	ENSOARG00000008682|ENSOARG00000013010|ENSOARG00000014785|ENSOARG00000016724	oas:101122979|oas:101106706|oas:101108851|oas:101108919|	101122979|101106706|101108851|101108919|	HMGCS1|MVD|IDI1|HMGCR|	http://www.genome.jp/kegg-bin/show_pathway?oas00900/oas:101106706%09red/oas:101122979%09red/oas:101108919%09red/oas:101108851%09red
African trypanosomiasis	KEGG PATHWAY	oas05143	5	35	0.00675948	0.100688	ENSOARG00000018242|ENSOARG00000011584|ENSOARG00000019163|ENSOARG00000010944|ENSOARG00000019174	oas:101113636|oas:101106266|oas:101105437|oas:101108797|oas:101106199|	101113636|101106266|101105437|101108797|101106199|	|F2RL1|HBB| | |	http://www.genome.jp/kegg-bin/show_pathway?oas05143/oas:101108797%09red/oas:101113636%09red/oas:101106266%09red/oas:101106199%09red/oas:101105437%09red
Steroid biosynthesis	KEGG PATHWAY	oas00100	4	22	0.00722886	0.100688	ENSOARG00000008478|ENSOARG00000015250|ENSOARG00000001371|ENSOARG00000017477	oas:100125351|oas:101119109|oas:101118320|oas:101113583|	100125351|101119109|101118320|101113583|	SQLE|FDFT1|DHCR7| |	http://www.genome.jp/kegg-bin/show_pathway?oas00100/oas:100125351%09red/oas:101118320%09red/oas:101119109%09red/oas:101113583%09red
Protein digestion and absorption	KEGG PATHWAY	oas04974	9	115	0.0129095	0.167824	ENSOARG00000006454|ENSOARG00000014039|ENSOARG00000003370|ENSOARG00000005727|ENSOARG00000017257|ENSOARG00000011573|ENSOARG00000018591|ENSOARG00000019333|ENSOARG00000014461	oas:100170324|oas:101115457|oas:101112618|oas:101116007|oas:101119261|oas:101102992|oas:101117548|oas:100196905|oas:101114569|	100170324|101115457|101112618|101116007|101119261|101102992|101117548|100196905|101114569|	DPP4|COL5A3|MME|COL17A1|COL7A1|COL9A1|COL11A1|COL2A1|COL24A1|	http://www.genome.jp/kegg-bin/show_pathway?oas04974/oas:100170324%09red/oas:101112618%09red/oas:101102992%09red/oas:101117548%09red/oas:101116007%09red/oas:101114569%09red/oas:100196905%09red/oas:101119261%09red/oas:101115457%09red
TGF-beta signaling pathway	KEGG PATHWAY	oas04350	7	78	0.0142933	0.174199	ENSOARG00000001111|ENSOARG00000021069|ENSOARG00000020058|ENSOARG00000018039|ENSOARG00000009841|ENSOARG00000003437|ENSOARG00000002050	oas:101111650|oas:443502|oas:101106433|oas:443175|oas:443304|oas:101116988|oas:554323|	101111650|443502|101106433|443175|443304|101116988|554323|	ID1|BMP4|THBS1|BMP7|ACVR2A, ACVR2|PITX2|TGFB3|	http://www.genome.jp/kegg-bin/show_pathway?oas04350/oas:101111650%09red/oas:443175%09red/oas:101106433%09red/oas:101116988%09red/oas:443502%09red/oas:554323%09red/oas:443304%09red
Bile secretion	KEGG PATHWAY	oas04976	7	83	0.0190493	0.206484	ENSOARG00000018133|ENSOARG00000006982|ENSOARG00000001232|ENSOARG00000012954|ENSOARG00000017639|ENSOARG00000001169|ENSOARG00000016724	oas:443347|oas:443268|oas:101109370|oas:101113341|oas:443535|oas:101107030|oas:101108919|	443347|443268|101109370|101113341|443535|101107030|101108919|	CFTR|AQP4| |CA2| | |HMGCR|	http://www.genome.jp/kegg-bin/show_pathway?oas04976/oas:101107030%09red/oas:101113341%09red/oas:101108919%09red/oas:443347%09red/oas:443268%09red/oas:101109370%09red/oas:443535%09red
PI3K-Akt signaling pathway	KEGG PATHWAY	oas04151	19	356	0.0200209	0.206484	ENSOARG00000000744|ENSOARG00000009764|ENSOARG00000014039|ENSOARG00000000327|ENSOARG00000017490|ENSOARG00000005412|ENSOARG00000020058|ENSOARG00000002590|ENSOARG00000002180|ENSOARG00000007270|ENSOARG00000005941|ENSOARG00000009585|ENSOARG00000008389|ENSOARG00000012064|ENSOARG00000003293|ENSOARG00000018591|ENSOARG00000005375|ENSOARG00000019333|ENSOARG00000014461	oas:100216328|oas:101119919|oas:101115457|oas:101102692|oas:101115211|oas:101118038|oas:101106433|oas:443058|oas:101123247|oas:101122429|oas:101118337|oas:101121489|oas:101117689|oas:101102873|oas:101117784|oas:101117548|oas:443548|oas:100196905|oas:101114569|	100216328|101119919|101115457|101102692|101115211|101118038|101106433|443058|101123247|101122429|101118337|101121489|101117689|101102873|101117784|101117548|443548|100196905|101114569|	LAMC2|ITGB4|COL5A3|LAMA1|THBS4|ITGA3|THBS1|SPP1, OPN|PIK3R3|LAMC3|TNC|FGF20|ITGA8|FIGF|PDGFD|COL11A1|FGFR2, FGFR2IIIb|COL2A1|COL24A1|	http://www.genome.jp/kegg-bin/show_pathway?oas04151/oas:101121489%09red/oas:101118337%09red/oas:101115211%09red/oas:101117784%09red/oas:443058%09red/oas:101118038%09red/oas:100216328%09red/oas:101117548%09red/oas:100196905%09red/oas:101117689%09red/oas:101106433%09red/oas:101114569%09red/oas:101115457%09red/oas:101122429%09red/oas:443548%09red/oas:101102692%09red/oas:101102873%09red/oas:101119919…
Cardiac muscle contraction	KEGG PATHWAY	oas04260	7	84	0.0201189	0.206484	ENSOARG00000019316|ENSOARG00000017779|ENSOARG00000001845|ENSOARG00000004312|ENSOARG00000013089|ENSOARG00000006996|ENSOARG00000011750	oas:442995|oas:100196904|oas:100145865|oas:101111132|oas:101116562|oas:101115408|oas:101121691|	442995|100196904|100145865|101111132|101116562|101115408|101121691|	OMYHCS|MYL2|TPM1|TNNC1|CACNA1C|MYL3|MYL4|	http://www.genome.jp/kegg-bin/show_pathway?oas04260/oas:442995%09red/oas:101116562%09red/oas:101111132%09red/oas:101121691%09red/oas:100196904%09red/oas:101115408%09red/oas:100145865%09red
Adrenergic signaling in cardiomyocytes	KEGG PATHWAY	oas04261	10	151	0.0244434	0.238323	ENSOARG00000019316|ENSOARG00000017779|ENSOARG00000015385|ENSOARG00000002180|ENSOARG00000001845|ENSOARG00000004312|ENSOARG00000013089|ENSOARG00000006996|ENSOARG00000001512|ENSOARG00000011750	oas:442995|oas:100196904|oas:443107|oas:101123247|oas:100145865|oas:101111132|oas:101116562|oas:101115408|oas:101111582|oas:101121691|	442995|100196904|443107|101123247|100145865|101111132|101116562|101115408|101111582|101121691|	OMYHCS|MYL2|AGTR1, AT1-R|PIK3R3|TPM1|TNNC1|CACNA1C|MYL3|SCN5A|MYL4|	http://www.genome.jp/kegg-bin/show_pathway?oas04261/oas:442995%09red/oas:443107%09red/oas:101111582%09red/oas:101116562%09red/oas:101111132%09red/oas:101121691%09red/oas:100196904%09red/oas:101115408%09red/oas:100145865%09red/oas:101123247%09red
Toxoplasmosis	KEGG PATHWAY	oas05145	9	134	0.0295533	0.274423	ENSOARG00000000744|ENSOARG00000017639|ENSOARG00000000327|ENSOARG00000002180|ENSOARG00000008817|ENSOARG00000007270|ENSOARG00000008800|ENSOARG00000007452|ENSOARG00000002050	oas:100216328|oas:443535|oas:101102692|oas:101123247|oas:494436|oas:101122429|oas:494436|oas:101107064|oas:554323|	100216328|443535|101102692|101123247|494436|101122429|494436|101107064|554323|	LAMC2| |LAMA1|PIK3R3|HSP70.1|LAMC3|HSP70.1|HSPA6|TGFB3|	http://www.genome.jp/kegg-bin/show_pathway?oas05145/oas:494436%09red/oas:443535%09red/oas:100216328%09red/oas:101107064%09red/oas:101123247%09red/oas:101122429%09red/oas:101102692%09red/oas:554323%09red
Inflammatory mediator regulation of TRP channels	KEGG PATHWAY	oas04750	7	100	0.0432565	0.38341	ENSOARG00000008133|ENSOARG00000002180|ENSOARG00000013144|ENSOARG00000008480|ENSOARG00000011584|ENSOARG00000020462|ENSOARG00000020480	oas:443018|oas:101123247|oas:101103054|oas:101113251|oas:101106266|oas:101108354|oas:101116403|	443018|101123247|101103054|101113251|101106266|101108354|101116403|	5HT2A|PIK3R3|IL1R1| |F2RL1|IL1RAP|PLA2G4F|	http://www.genome.jp/kegg-bin/show_pathway?oas04750/oas:101103054%09red/oas:101108354%09red/oas:101113251%09red/oas:101116403%09red/oas:101123247%09red/oas:101106266%09red/oas:443018%09red
